# Supplementary material for: Accessing bimetallic complexes through a variable bridging ligand strategy
Source: Royal Society of Chemistry journal article supplement (doi:10.1039/d4dt02903h), 2024-11-26
Supplement: d4dt02903h1.pdf [file d4dt02903h1.pdf]

## Electronic Supplementary Information (ESI)

for

### Accessing bimetallic complexes through a variable bridging ligand strategy

Hansani T. Lekam Wasam Liyanage,<sup>a</sup> Mark D. Smith,<sup>b</sup> Kraig A. Wheeler,<sup>c</sup> and Radu F. Semeniuc<sup>a\*</sup>

<sup>a</sup> Department of Chemistry and Biochemistry, Eastern Illinois University, Charleston, Illinois 61920, USA. E-mail rsemeniuc@eiu.edu

<sup>b</sup> Department of Chemistry and Biochemistry, University of South Carolina, Columbia, South Carolina 29208, USA.

<sup>c</sup> Department of Chemistry, Whitworth University, Spokane, Washington 99251, USA.

#### Table of Contents:

**Page 2: Figure S1.** The <sup>1</sup>H-NMR spectrum of the HL<sup>Q2</sup>Pz ligand.

**Page 2: Figure S2.** The IR spectrum of the ligand in KBr matrix

**Page 2: Table S1.** Summary of the IR and UV-Visible spectroscopic data for (L<sup>Q2</sup>Pz)Cu(OAc) · H<sub>2</sub>O, (L<sup>Q2</sup>Pz)Cu(BF<sub>4</sub>), and (L<sup>Q2</sup>Pz)Cu(ClO<sub>4</sub>) · MeCN.

**Page 3: Table S2.** Crystal data collection and refinement parameters for (L<sup>Q2</sup>Pz)Cu(OAc), (L<sup>Q2</sup>Pz)Cu(BF<sub>4</sub>), and (L<sup>Q2</sup>Pz)Cu(NCMe)]ClO<sub>4</sub> complexes.

**Page 4: Table S3.** Selected bond lengths (Å) and angles (°) for (L<sup>Q2</sup>pz)Cu(OAc).

**Page 4: Table S4.** Selected bond lengths (Å) and angles (°) for (L<sup>Q2</sup>Pz)CuBF<sub>4</sub>.

**Page 5: Table S5.** Selected bond lengths (Å) and angles (°) for [(L<sup>Q2</sup>Pz)Cu(NCCH<sub>3</sub>)]ClO<sub>4</sub>.

**Page 5: Table S6.** Selected IR and UV-Visible spectroscopic data for (L<sup>Q2</sup>Pz)Cu[O<sub>2</sub>CCH(pz)<sub>2</sub>] and (L<sup>Q2</sup>Pz)Cu[O<sub>2</sub>CCH(CH<sub>2</sub>pz)<sub>2</sub>].

**Page 5: Table S7.** Crystal data collection and refinement parameters for (L<sup>Q2</sup>Pz)Cu[O<sub>2</sub>CCH(pz)<sub>2</sub>] and (L<sup>Q2</sup>Pz)Cu[O<sub>2</sub>CCH(CH<sub>2</sub>pz)<sub>2</sub>] metalloligands.

**Page 6: Table S8.** Selected bond lengths (Å) and angles (°) for (L<sup>Q2</sup>Pz)Cu[O<sub>2</sub>CCH(pz)<sub>2</sub>].

**Page 6: Table S9.** Selected bond lengths (Å) and angles (°) for (L<sup>Q2</sup>Pz)Cu[O<sub>2</sub>CCH(CH<sub>2</sub>pz)<sub>2</sub>].

**Page 7: Table S10.** Selected IR and UV-Visible spectroscopic data for {(L<sup>Q2</sup>Pz)Cu<sup>II</sup>[O<sub>2</sub>CCH(CH<sub>2</sub>pz)<sub>2</sub>]<sub>2</sub>Cu<sup>I</sup>(PPh<sub>3</sub>)<sub>2</sub>}}NO<sub>3</sub> and {(L<sup>Q2</sup>Pz)Cu<sup>II</sup>[O<sub>2</sub>CCH(CH<sub>2</sub>pz)<sub>2</sub>]<sub>2</sub>Cu<sup>I</sup>(PF<sub>6</sub>)}.

**Page 7: Table S11.** Crystal data collection and refinement parameters for

{(L<sup>Q2</sup>Pz)Cu<sup>II</sup>[O<sub>2</sub>CCH(CH<sub>2</sub>pz)<sub>2</sub>]<sub>2</sub>Cu<sup>I</sup>(PPh<sub>3</sub>)<sub>2</sub>}}NO<sub>3</sub> and {(L<sup>Q2</sup>Pz)Cu<sup>II</sup>[O<sub>2</sub>CCH(CH<sub>2</sub>pz)<sub>2</sub>]<sub>2</sub>Cu<sup>I</sup>(PF<sub>6</sub>)}

**Page 8: Table S12.** Selected bond lengths (Å) and angles (°) for {(L<sup>Q2</sup>Pz)Cu<sup>II</sup>[O<sub>2</sub>CCH(CH<sub>2</sub>pz)<sub>2</sub>]<sub>2</sub>Cu<sup>I</sup>(PPh<sub>3</sub>)<sub>2</sub>}}NO<sub>3</sub>

**Page 8: Table S13.** Selected bond lengths (Å) and angles (°) for {(L<sup>Q2</sup>Pz)Cu<sup>II</sup>[O<sub>2</sub>CCH(CH<sub>2</sub>pz)<sub>2</sub>]<sub>2</sub>Cu<sup>I</sup>(PF<sub>6</sub>)}

**Page 9: ORTEP Figures**

**Page 13: PXRD Figures**

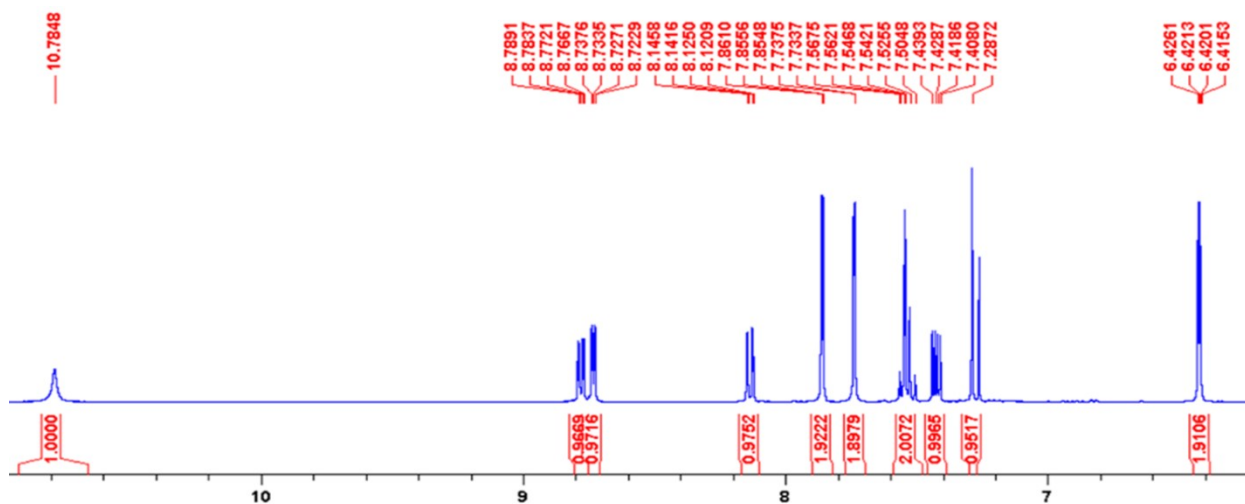

**Figure S1.** The  $^1\text{H}$ -NMR spectrum of the  $\text{HL}^{\text{Q2Pz}}$  ligand.

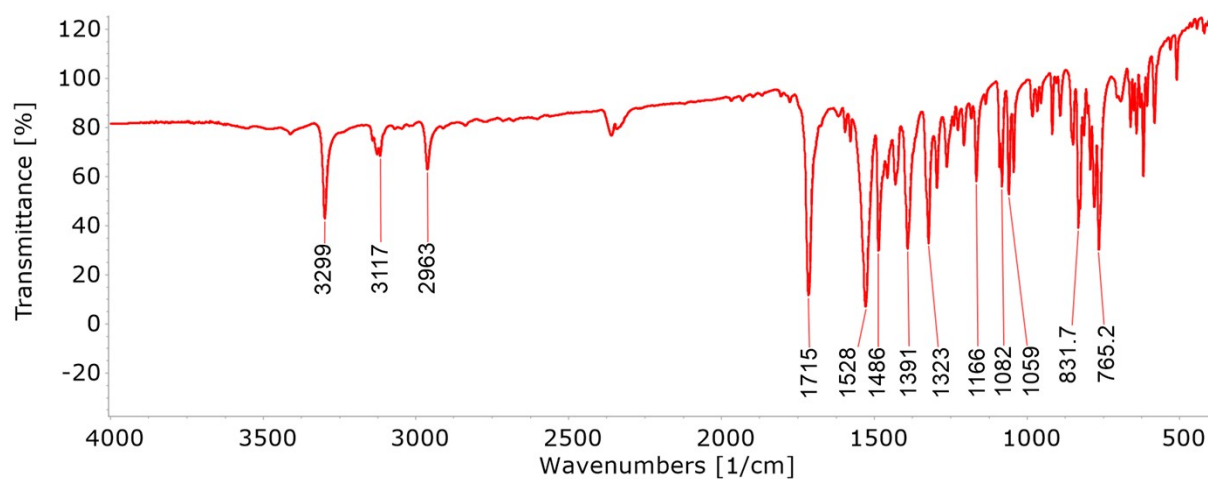

**Figure S2.** The IR spectrum of the  $\text{HL}^{\text{Q2Pz}}$  ligand in KBr matrix.

**Table S1.** Summary of the IR and UV-Visible spectroscopic data for  $(\text{L}^{\text{Q2Pz}}\text{Cu}(\text{OAc}) \cdot \text{H}_2\text{O})$ ,  $(\text{L}^{\text{Q2Pz}}\text{Cu}(\text{BF}_4))$ , and  $(\text{L}^{\text{Q2Pz}}\text{Cu}(\text{ClO}_4) \cdot \text{MeCN})$ .

| Compound                                                                 | $\tilde{\nu}_{\text{NH}}$<br>$\text{cm}^{-1}$ | $\tilde{\nu}_{\text{CO}}$<br>$\text{cm}^{-1}$ | $\tilde{\nu}_{\text{pz}}$<br>$\text{cm}^{-1}$ | $\tilde{\nu}_{\text{as COO}}$<br>$\text{cm}^{-1}$ | $\tilde{\nu}_{\text{s COO}}$<br>$\text{cm}^{-1}$ | $\Delta$<br>$\text{cm}^{-1}$ | $\lambda_{\text{max}}/\text{nm}$<br>( $\epsilon/\text{M}^{-1}\text{cm}^{-1}$ ) |
|--------------------------------------------------------------------------|-----------------------------------------------|-----------------------------------------------|-----------------------------------------------|---------------------------------------------------|--------------------------------------------------|------------------------------|--------------------------------------------------------------------------------|
| $\text{HL}^{\text{Q2Pz}}$                                                | 3299                                          | 1715                                          | 1528                                          | -                                                 | -                                                | -                            | -                                                                              |
| $(\text{L}^{\text{Q2Pz}}\text{Cu}(\text{OAc}) \cdot \text{H}_2\text{O})$ | -                                             | 1632                                          | 1500                                          | 1582                                              | 1387                                             | 195                          | 258 ( $72.2 \times 10^3$ ), 368 ( $5.7 \times 10^3$ ), 634 (99)                |
| $(\text{L}^{\text{Q2Pz}}\text{Cu}(\text{BF}_4))$                         | -                                             | 1608                                          | 1505                                          | -                                                 | -                                                | -                            | 260 ( $42.3 \times 10^3$ ), 368 ( $4.7 \times 10^3$ ), 670 (125)               |
| $(\text{L}^{\text{Q2Pz}}\text{Cu}(\text{ClO}_4) \cdot \text{MeCN})$      | -                                             | 1620                                          | 1504                                          | -                                                 | -                                                | -                            | 259 ( $59.4 \times 10^3$ ), 368 ( $5.7 \times 10^3$ ), 667 (134)               |

**Table S2.** Crystal data collection and refinement parameters for **(L<sup>Q2</sup>Pz)Cu(OAc)**, **(L<sup>Q2</sup>Pz)Cu(BF<sub>4</sub>)**, and **[(L<sup>Q2</sup>Pz)Cu(NCMe)]ClO<sub>4</sub>** complexes.

|                                                                      | <b>(L<sup>Q2</sup>Pz)Cu(OAc)</b>                                                                        | <b>(L<sup>Q2</sup>Pz)Cu(BF<sub>4</sub>)</b>                        | <b>[(L<sup>Q2</sup>Pz)Cu(NCMe)]ClO<sub>4</sub></b>                  |
|----------------------------------------------------------------------|---------------------------------------------------------------------------------------------------------|--------------------------------------------------------------------|---------------------------------------------------------------------|
| <b>Crystal data</b>                                                  |                                                                                                         |                                                                    |                                                                     |
| Chemical formula                                                     | 0.28(H <sub>2</sub> O)·0.229(O)·<br>2(C <sub>19</sub> H <sub>16</sub> CuN <sub>6</sub> O <sub>3</sub> ) | C <sub>17</sub> H <sub>13</sub> BCuF <sub>4</sub> N <sub>6</sub> O | C <sub>19</sub> H <sub>16</sub> CuN <sub>7</sub> O·ClO <sub>4</sub> |
| Mr                                                                   | 888.56                                                                                                  | 467.68                                                             | 521.38                                                              |
| Crystal system, space group                                          | Triclinic, P                                                                                            | Monoclinic, P21/n                                                  | Monoclinic, C2/c                                                    |
| Temperature (K)                                                      | 100                                                                                                     | 100                                                                | 100                                                                 |
| a, b, c (Å)                                                          | 9.6542 (6)<br>13.8554 (8)<br>16.0283 (9)                                                                | 9.1850 (4)<br>17.3019 (6)<br>12.1405 (4)                           | 29.990 (3)<br>8.1215 (8)<br>17.9630 (16)                            |
| α, β, γ (°)                                                          | 114.194 (3)<br>93.294 (3)<br>103.183 (3)                                                                | 90.977(2)                                                          | 104.213(4)                                                          |
| V (Å <sup>3</sup> )                                                  | 1876.4 (2)                                                                                              | 1929.06 (12)                                                       | 4241.2 (7)                                                          |
| Z                                                                    | 2                                                                                                       | 4                                                                  | 8                                                                   |
| Radiation type                                                       | Cu Kα                                                                                                   | Cu Kα                                                              | Cu Kα                                                               |
| μ (mm <sup>-1</sup> )                                                | 1.97                                                                                                    | 2.15                                                               | 3.05                                                                |
| Crystal size (mm)                                                    | 0.29 × 0.12 × 0.11                                                                                      | 0.17 × 0.16 × 0.08                                                 | 0.28 × 0.17 × 0.13                                                  |
|                                                                      |                                                                                                         |                                                                    |                                                                     |
| <b>Data collection</b>                                               |                                                                                                         |                                                                    |                                                                     |
| Diffractometer                                                       | Bruker D8 Venture                                                                                       | Bruker D8 Venture                                                  | Bruker D8 Venture                                                   |
| Absorption correction                                                | Multi-scan<br>SADABS 2016/2                                                                             | Multi-scan<br>SADABS 2016/2                                        | Multi-scan<br>SADABS 2016/2                                         |
| Tmin, Tmax                                                           | 0.615, 0.753                                                                                            | 0.671, 0.753                                                       | 0.591, 0.753                                                        |
| No. of measured, independent and<br>observed [I > 2σ(I)] reflections | 42460, 6721, 6029                                                                                       | 28188, 3488, 2940                                                  | 45384, 3891, 3683                                                   |
| Rint                                                                 | 0.040                                                                                                   | 0.052                                                              | 0.051                                                               |
| (sin θ/λ) <sub>max</sub> (Å <sup>-1</sup> )                          | 0.602                                                                                                   | 0.602                                                              | 0.602                                                               |
|                                                                      |                                                                                                         |                                                                    |                                                                     |
| <b>Refinement</b>                                                    |                                                                                                         |                                                                    |                                                                     |
| R[F <sup>2</sup> > 2σ(F <sup>2</sup> )], wR(F <sup>2</sup> ), S      | 0.038, 0.099, 1.12                                                                                      | 0.045, 0.167, 1.06                                                 | 0.035, 0.090, 1.06                                                  |
| No. of reflections                                                   | 6721                                                                                                    | 3488                                                               | 3891                                                                |
| No. of parameters                                                    | 578                                                                                                     | 271                                                                | 309                                                                 |
| No. of restraints                                                    | 56                                                                                                      |                                                                    | 69                                                                  |
| Δρ <sub>max</sub> , Δρ <sub>min</sub> (e Å <sup>-3</sup> )           | 0.41, -0.44                                                                                             | 0.96, -0.81                                                        | 0.93, -0.53                                                         |

**Table S3.** Selected bond lengths (Å) and angles (°) for (L<sup>Q2pz</sup>)Cu(OAc).

| Atoms    | Bond lengths | Atoms        | Bond Angles |
|----------|--------------|--------------|-------------|
| Cu1A O2A | 1.9420(19)   | O2A Cu1A N1A | 95.10(9)    |
| Cu1A N1A | 2.002(2)     | O2A Cu1A N2A | 177.10(9)   |
| Cu1A N2A | 1.969(2)     | O2A Cu1A N3A | 93.35(9)    |
| Cu1A N3A | 2.035(2)     | O2A Cu1A N5A | 95.35(8)    |
| Cu1A N5A | 2.329(2)     | N1A Cu1A N3A | 155.34(9)   |
|          |              | N1A Cu1A N5A | 117.12(8)   |
|          |              | N2A Cu1A N1A | 82.20(9)    |
|          |              | N2A Cu1A N3A | 89.55(9)    |
|          |              | N2A Cu1A N5A | 84.97(9)    |
|          |              | N3A Cu1A N5A | 85.01(9)    |
| Cu1B O2B | 1.944(8)     | O2B Cu1B N1B | 91.4(4)     |
| Cu1B N1B | 2.006(2)     | O2B Cu1B N2B | 168.3(3)    |
| Cu1B N2B | 1.973(2)     | O2B Cu1B N3B | 104.2(4)    |
| Cu1B N3B | 2.088(3)     | O2B Cu1B N5B | 87.6(4)     |
| Cu1B N5B | 2.236(2)     | N1B Cu1B N3B | 144.95(10)  |
|          |              | N1B Cu1B N5B | 127.71(10)  |
|          |              | N2B Cu1B N1B | 81.96(10)   |
|          |              | N2B Cu1B N3B | 86.61(10)   |
|          |              | N2B Cu1B N5B | 88.77(9)    |
|          |              | N3B Cu1B N5B | 84.78(9)    |

**Table S4.** Selected bond lengths (Å) and angles (°) for (L<sup>Q2Pz</sup>)CuBF<sub>4</sub>.

| Atoms  | Bond lengths | Atoms     | Bond Angles |
|--------|--------------|-----------|-------------|
| Cu1 F1 | 1.975(2)     | F1 Cu1 N1 | 176.93(11)  |
| Cu1 N1 | 1.986(3)     | F1 Cu1 N3 | 94.40(10)   |
| Cu1 N3 | 2.194(3)     | F1 Cu1 N5 | 93.16(11)   |
| Cu1 N5 | 2.070(3)     | F1 Cu1 N6 | 94.71(11)   |
| Cu1 N6 | 2.003(3)     | N1 Cu1 N3 | 86.67(10)   |
|        |              | N1 Cu1 N5 | 89.76(11)   |
|        |              | N1 Cu1 N6 | 82.33(11)   |
|        |              | N5 Cu1 N3 | 86.81(11)   |
|        |              | N6 Cu1 N3 | 125.10(12)  |
|        |              | N6 Cu1 N5 | 146.25(12)  |

**Table S5.** Selected bond lengths (Å) and angles (°) for [(L<sup>Q2</sup>Pz)Cu(NCCH<sub>3</sub>)]ClO<sub>4</sub>.

| Atoms  | Bond lengths | Atoms     | Bond Angles |
|--------|--------------|-----------|-------------|
| Cu1 N1 | 2.0034(18)   | N1 Cu1 N4 | 123.75(8)   |
| Cu1 N2 | 1.9606(18)   | N1 Cu1 N6 | 149.32(7)   |
| Cu1 N4 | 2.1960(19)   | N2 Cu1 N1 | 82.40(8)    |
| Cu1 N6 | 2.0881(19)   | N2 Cu1 N4 | 87.14(7)    |
| Cu1 N7 | 1.961(2)     | N2 Cu1 N6 | 89.67(8)    |
|        |              | N2 Cu1 N7 | 177.18(8)   |
|        |              | N6 Cu1 N4 | 85.11(7)    |
|        |              | N7 Cu1 N1 | 95.00(8)    |
|        |              | N7 Cu1 N4 | 95.23(8)    |
|        |              | N7 Cu1 N6 | 92.05(8)    |

**Table S6.** Selected IR and UV-Visible spectroscopic data for (L<sup>Q2</sup>Pz)Cu[O<sub>2</sub>CCH(pz)<sub>2</sub>] and (L<sup>Q2</sup>Pz)Cu[O<sub>2</sub>CCH(CH<sub>2</sub>pz)<sub>2</sub>].

| Compound                                                                     | $\tilde{\nu}_{\text{CO}}$<br>cm <sup>-1</sup> | $\tilde{\nu}_{\text{pz}}$<br>cm <sup>-1</sup> | $\tilde{\nu}_{\text{as COO}}$<br>cm <sup>-1</sup> | $\tilde{\nu}_{\text{s COO}}$<br>cm <sup>-1</sup> | $\Delta$<br>cm <sup>-1</sup> | $\lambda_{\text{max}}/\text{nm}$<br>( $\epsilon/M^{-1}\text{cm}^{-1}$ )  |
|------------------------------------------------------------------------------|-----------------------------------------------|-----------------------------------------------|---------------------------------------------------|--------------------------------------------------|------------------------------|--------------------------------------------------------------------------|
| (L <sup>Q2</sup> Pz)Cu[O <sub>2</sub> CCH(pz) <sub>2</sub> ]                 | 1654                                          | 1502                                          | 1626                                              | 1391                                             | 235                          | 259 (76.8 x 10 <sup>3</sup> ), 368 (6.9 x 10 <sup>3</sup> ), 669 (144.9) |
| (L <sup>Q2</sup> Pz)Cu[O <sub>2</sub> CCH(CH <sub>2</sub> pz) <sub>2</sub> ] | 1626                                          | 1504                                          | 1612                                              | 1401                                             | 211                          | 259 (73.6 x 10 <sup>3</sup> ), 365 (6.7 x 10 <sup>3</sup> ), 637 (130)   |

**Table S7.** Crystal data collection and refinement parameters for (L<sup>Q2</sup>Pz)Cu[O<sub>2</sub>CCH(pz)<sub>2</sub>] and (L<sup>Q2</sup>Pz)Cu[O<sub>2</sub>CCH(CH<sub>2</sub>pz)<sub>2</sub>] metalloligands.

|                             | (L <sup>Q2</sup> Pz)Cu[O <sub>2</sub> CCH(pz) <sub>2</sub> ]     | (L <sup>Q2</sup> Pz)Cu[O <sub>2</sub> CCH(CH <sub>2</sub> pz) <sub>2</sub> ]                              |
|-----------------------------|------------------------------------------------------------------|-----------------------------------------------------------------------------------------------------------|
| Crystal data                |                                                                  |                                                                                                           |
| Chemical formula            | C <sub>25</sub> H <sub>20</sub> CuN <sub>10</sub> O <sub>3</sub> | C <sub>27</sub> H <sub>24</sub> CuN <sub>10</sub> O <sub>3</sub> ·0.566(CH <sub>2</sub> Cl <sub>2</sub> ) |
| Mr                          | 572.05                                                           | 648.08                                                                                                    |
| Crystal system, space group | Monoclinic, P21                                                  | Triclinic, P                                                                                              |
| Temperature (K)             | 100                                                              | 173                                                                                                       |
| a, b, c (Å)                 | 8.8835 (3)<br>15.2234 (5)<br>9.6987 (3)                          | 7.9593 (6)<br>12.0730 (9)<br>15.9301 (11)                                                                 |
| $\alpha, \beta, \gamma$ (°) | $\beta = 112.045$ (2)                                            | 69.659 (4)<br>81.772 (4)<br>89.586 (4)                                                                    |
| V (Å <sup>3</sup> )         | 1215.73 (7)                                                      | 1419.04 (18)                                                                                              |
| Z                           | 2                                                                | 2                                                                                                         |
| Radiation type              | Cu K $\alpha$                                                    | Cu K $\alpha$                                                                                             |
| $\mu$ (mm <sup>-1</sup> )   | 1.71                                                             | 2.49                                                                                                      |
| Crystal size (mm)           | 0.43 × 0.41 × 0.07                                               | 0.26 × 0.13 × 0.12                                                                                        |

|                                                                            |                             |                             |
|----------------------------------------------------------------------------|-----------------------------|-----------------------------|
| Data collection                                                            |                             |                             |
| Diffractionmeter                                                           | Bruker APEXII CCD           | Bruker APEX-II CCD          |
| Absorption correction                                                      | Multi-scan<br>SADABS 2016/2 | Multi-scan<br>SADABS 2016/2 |
| Tmin, Tmax                                                                 | 0.596, 0.753                | 0.205, 0.272                |
| No. of measured, independent and observed [ $I > 2\sigma(I)$ ] reflections | 14511, 4250, 4183           | 30909, 5069, 4408           |
| Rint                                                                       | 0.030                       | 0.067                       |
| ( $\sin \theta/\lambda$ ) <sub>max</sub> ( $\text{\AA}^{-1}$ )             | 0.602                       | 0.604                       |
| Refinement                                                                 |                             |                             |
| R[F2 > 2σ(F2)], wR(F2), S                                                  | 0.024, 0.060, 1.05          | 0.038, 0.109, 1.09          |
| No. of reflections                                                         | 4250                        | 5069                        |
| No. of parameters                                                          | 353                         | 534                         |
| No. of restraints                                                          | 1                           | 300                         |
| $\Delta\rho_{\text{max}}, \Delta\rho_{\text{min}}$ ( $e \text{\AA}^{-3}$ ) | 0.26, -0.22                 | 0.49, -0.52                 |

**Table S8.** Selected bond lengths ( $\text{\AA}$ ) and angles ( $^\circ$ ) for  $(\text{L}^{\text{O2Pz}}\text{Cu}[\text{O}_2\text{CCH}(\text{pz})_2])$ .

| Atoms  | Bond lengths | Atoms     | Bond Angles |
|--------|--------------|-----------|-------------|
| Cu1 O2 | 1.9436(18)   | O2 Cu1 N1 | 97.14(9)    |
| Cu1 N1 | 1.992(2)     | O2 Cu1 N2 | 175.18(10)  |
| Cu1 N2 | 1.973(2)     | O2 Cu1 N4 | 89.33(8)    |
| Cu1 N4 | 2.126(2)     | O2 Cu1 N6 | 95.55(8)    |
| Cu1 N6 | 2.152(2)     | N1 Cu1 N4 | 138.08(11)  |
|        |              | N1 Cu1 N6 | 134.59(10)  |
|        |              | N2 Cu1 N1 | 82.50(10)   |
|        |              | N2 Cu1 N4 | 87.77(9)    |
|        |              | N2 Cu1 N6 | 88.05(10)   |
|        |              | N4 Cu1 N6 | 85.32(10)   |

**Table S9.** Selected bond lengths ( $\text{\AA}$ ) and angles ( $^\circ$ ) for  $(\text{L}^{\text{O2Pz}}\text{Cu}[\text{O}_2\text{CCH}(\text{CH}_2\text{pz})_2])$ .

| Atoms   | Bond lengths | Atoms      | Bond Angles |
|---------|--------------|------------|-------------|
| Cu1 N1  | 2.009(2)     | N1 Cu1 N4  | 127.70(7)   |
| Cu1 N2  | 1.9927(19)   | N1 Cu1 N6A | 148.0(6)    |
| Cu1 N4  | 2.377(2)     | N2 Cu1 N1  | 82.21(8)    |
| Cu1 N6  | 1.998(13)    | N2 Cu1 N4  | 84.24(7)    |
| Cu1 N6A | 2.174(19)    | N2 Cu1 N6  | 92.2(4)     |
| Cu1 O2  | 1.9432(16)   | N2 Cu1 N6A | 86.6(6)     |
|         |              | N6 Cu1 N1  | 144.8(4)    |
|         |              | N6 Cu1 N4  | 85.8(4)     |
|         |              | N6A Cu1 N4 | 80.4(6)     |
|         |              | O2 Cu1 N1  | 96.09(8)    |
|         |              | O2 Cu1 N2  | 170.09(8)   |
|         |              | O2 Cu1 N4  | 89.17(7)    |
|         |              | O2 Cu1 N6  | 94.7(4)     |
|         |              | O2 Cu1 N6A | 99.6(6)     |

**Table S10.** Selected IR and UV-Visible spectroscopic data for  $\{(L^O2Pz)Cu^{II}[O_2CCH(CH_2pz)_2Cu^I(PPh_3)_2]\}NO_3$  and  $\{(L^O2Pz)Cu^{II}[O_2CCH(CH_2pz)_2]\}_2Cu^I(PF_6)$ .

| Compound                                                  | $\tilde{\nu}_{CO}$<br>cm <sup>-1</sup> | $\tilde{\nu}_{pz}$<br>cm <sup>-1</sup> | $\tilde{\nu}_{as\ COO}$<br>cm <sup>-1</sup> | $\tilde{\nu}_{s\ COO}$<br>cm <sup>-1</sup> | $\Delta$<br>cm <sup>-1</sup> | $\lambda_{max}/nm$ ( $\epsilon/M^{-1}cm^{-1}$ )                          |
|-----------------------------------------------------------|----------------------------------------|----------------------------------------|---------------------------------------------|--------------------------------------------|------------------------------|--------------------------------------------------------------------------|
| $\{(L^O2Pz)Cu^{II}[O_2CCH-(CH_2pz)_2Cu^I(PPh_3)_2]\}NO_3$ | 1625                                   | 1502                                   | 1607                                        | 1383                                       | 224                          | 259 (66.8 x 10 <sup>3</sup> ), 368 (6.7 x 10 <sup>3</sup> ), 655 (134.7) |
| $\{(L^O2Pz)Cu^{II}[O_2CCH-(CH_2pz)_2]\}_2Cu^I(PF_6)$      | 1624                                   | 1503                                   | 1612                                        | 1385                                       | 227                          | 259 (84.4 x 10 <sup>3</sup> ), 368 (6.2 x 10 <sup>3</sup> ), 669 (141.3) |

**Table S11.** Crystal data collection and refinement parameters for  $\{(L^O2Pz)Cu^{II}[O_2CCH(CH_2pz)_2Cu^I(PPh_3)_2]\}NO_3$  and  $\{(L^O2Pz)Cu^{II}[O_2CCH(CH_2pz)_2]\}_2Cu^I(PF_6)$

|                                                                            | $\{(L^O2Pz)Cu^{II}[O_2CCH(CH_2pz)_2Cu^I(PPh_3)_2]\}NO_3$                                                                                                                             | $\{(L^O2Pz)Cu^{II}[O_2CCH(CH_2pz)_2]\}_2Cu^I(PF_6)$                                             |
|----------------------------------------------------------------------------|--------------------------------------------------------------------------------------------------------------------------------------------------------------------------------------|-------------------------------------------------------------------------------------------------|
| Crystal data                                                               |                                                                                                                                                                                      |                                                                                                 |
| Chemical formula                                                           | C <sub>63</sub> H <sub>54</sub> Cu <sub>2</sub> N <sub>10</sub> O <sub>3</sub> P <sub>2</sub> ·CH <sub>2</sub> Cl <sub>2</sub> ·NO <sub>3</sub> ·2[CH <sub>2</sub> Cl <sub>2</sub> ] | C <sub>54</sub> H <sub>48</sub> Cu <sub>3</sub> N <sub>20</sub> O <sub>6</sub> ·PF <sub>6</sub> |
| Mr                                                                         | 1504.97                                                                                                                                                                              | 1408.71                                                                                         |
| Crystal system, space group                                                | Triclinic, P                                                                                                                                                                         | Monoclinic, C2/c                                                                                |
| Temperature (K)                                                            | 100                                                                                                                                                                                  | 100                                                                                             |
| a, b, c (Å)                                                                | 13.4052 (7),<br>14.3404 (7),<br>19.2792 (9)                                                                                                                                          | 25.722 (4)<br>15.807 (2)<br>34.480 (6)                                                          |
| $\alpha, \beta, \gamma$ (°)                                                | 77.040 (3),<br>70.484 (3),<br>81.514 (3)                                                                                                                                             | 95.155 (10)                                                                                     |
| V (Å <sup>3</sup> )                                                        | 3393.6 (3)                                                                                                                                                                           | 13962 (4)                                                                                       |
| Z                                                                          | 2                                                                                                                                                                                    | 8                                                                                               |
| Radiation type                                                             | Cu K $\alpha$                                                                                                                                                                        | Cu K $\alpha$                                                                                   |
| $\mu$ (mm <sup>-1</sup> )                                                  | 3.88                                                                                                                                                                                 | 1.92                                                                                            |
| Crystal size (mm)                                                          | 0.49 × 0.20 × 0.11                                                                                                                                                                   | 0.36 × 0.11 × 0.04                                                                              |
| Data collection                                                            |                                                                                                                                                                                      |                                                                                                 |
| Diffractometer                                                             | Bruker APEXII CCD                                                                                                                                                                    | Bruker APEX-II CCD                                                                              |
| Absorption correction                                                      | Multi-scan<br>SADABS 2016/2                                                                                                                                                          | Multi-scan<br>SADABS 2016/2                                                                     |
| Tmin, Tmax                                                                 | 0.499, 0.753                                                                                                                                                                         | 0.631, 0.753                                                                                    |
| No. of measured, independent and observed [ $I > 2\sigma(I)$ ] reflections | 73975, 12076, 10259                                                                                                                                                                  | 71301, 8255, 5035                                                                               |
| Rint                                                                       | 0.055                                                                                                                                                                                | 0.247                                                                                           |
| (sin $\theta/\lambda$ ) <sub>max</sub> (Å <sup>-1</sup> )                  | 0.603                                                                                                                                                                                | 0.521                                                                                           |
| Refinement                                                                 |                                                                                                                                                                                      |                                                                                                 |
| R[F <sup>2</sup> > 2 $\sigma$ (F <sup>2</sup> )], wR(F <sup>2</sup> ), S   | 0.041, 0.119, 1.06                                                                                                                                                                   | 0.070, 0.200, 1.01                                                                              |
| No. of reflections                                                         | 12076                                                                                                                                                                                | 8255                                                                                            |
| No. of parameters                                                          | 788                                                                                                                                                                                  | 812                                                                                             |
| $\Delta\rho_{max}, \Delta\rho_{min}$ (e Å <sup>-3</sup> )                  | 1.11, -0.57                                                                                                                                                                          | 0.48, -0.59                                                                                     |

**Table S12.** Selected bond lengths (Å) and angles (°) for  $\{(L^{O2Pz})Cu^{II}[O_2CCH(CH_2pz)_2Cu^I(PPh_3)_2]\}NO_3$ 

| Atoms   | Bond lengths | Atoms      | Bond Angles |
|---------|--------------|------------|-------------|
| Cu1 O2  | 1.9360(19)   | O2 Cu1 N1  | 93.24(9)    |
| Cu1 N1  | 2.020(2)     | O2 Cu1 N2  | 170.48(10)  |
| Cu1 N2  | 1.991(2)     | O2 Cu1 N4  | 89.68(10)   |
| Cu1 N4  | 2.129(3)     | O2 Cu1 N6  | 103.11(9)   |
| Cu1 N6  | 2.174(2)     | N1 Cu1 N4  | 142.53(10)  |
|         |              | N1 Cu1 N6  | 130.54(10)  |
|         |              | N2 Cu1 N1  | 82.03(10)   |
|         |              | N2 Cu1 N4  | 89.12(10)   |
|         |              | N2 Cu1 N6  | 86.18(9)    |
|         |              | N4 Cu1 N6  | 84.63(10)   |
| Cu2 P1  | 2.3187(7)    | P2 Cu2 P1  | 122.25(3)   |
| Cu2 P2  | 2.3037(7)    | N8 Cu2 P1  | 106.99(6)   |
| Cu2 N8  | 2.094(2)     | N8 Cu2 P2  | 105.40(6)   |
| Cu2 N10 | 2.082(2)     | N10 Cu2 P1 | 102.73(6)   |
|         |              | N10 Cu2 P2 | 108.87(7)   |
|         |              | N10 Cu2 N8 | 110.40(8)   |

**Table S13.** Selected bond lengths (Å) and angles (°) for  $\{(L^{O2Pz})Cu^{II}[O_2CCH(CH_2pz)_2]\}_2Cu^I(PF_6)$ 

| Atoms   | Bond lengths | Atoms       | Bond Angles |
|---------|--------------|-------------|-------------|
| Cu1 O2  | 1.932(5)     | O2 Cu1 N1   | 178.6(3)    |
| Cu1 N1  | 1.954(7)     | O2 Cu1 N2   | 96.6(3)     |
| Cu1 N2  | 2.001(7)     | O2 Cu1 N4   | 89.8(2)     |
| Cu1 N4  | 2.020(7)     | O2 Cu1 N6   | 97.0(2)     |
| Cu1 N6  | 2.353(7)     | N4 Cu1 N6   | 84.4(3)     |
| Cu2 N7  | 2.044(7)     | N9 Cu2 N7   | 113.2(3)    |
| Cu2 N9  | 2.008(7)     | N13 Cu2 N7  | 113.2(3)    |
| Cu2 N11 | 2.078(6)     | N13 Cu2 N9  | 113.5(3)    |
| Cu2 N13 | 2.008(7)     | N13 Cu2 N11 | 115.1(2)    |
| Cu3 O4  | 1.935(5)     | O4 Cu3 N15  | 167.2(3)    |
| Cu3 N15 | 1.976(6)     | O4 Cu3 N16  | 93.8(2)     |
| Cu3 N16 | 1.993(7)     | O4 Cu3 N17  | 101.6(2)    |
| Cu3 N17 | 2.131(7)     | O4 Cu3 N19  | 89.0(2)     |
| Cu3 N19 | 2.212(7)     | N17 Cu3 N19 | 84.7(3)     |



## ORTEP Figures

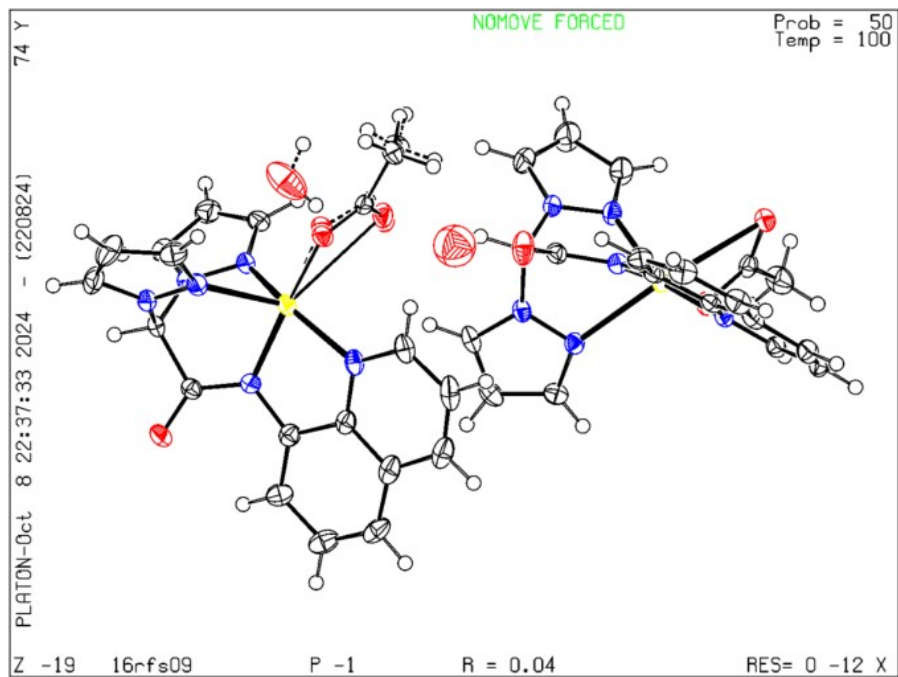

## ORTEP of $(L^2Pz)Cu(OAc)$ .

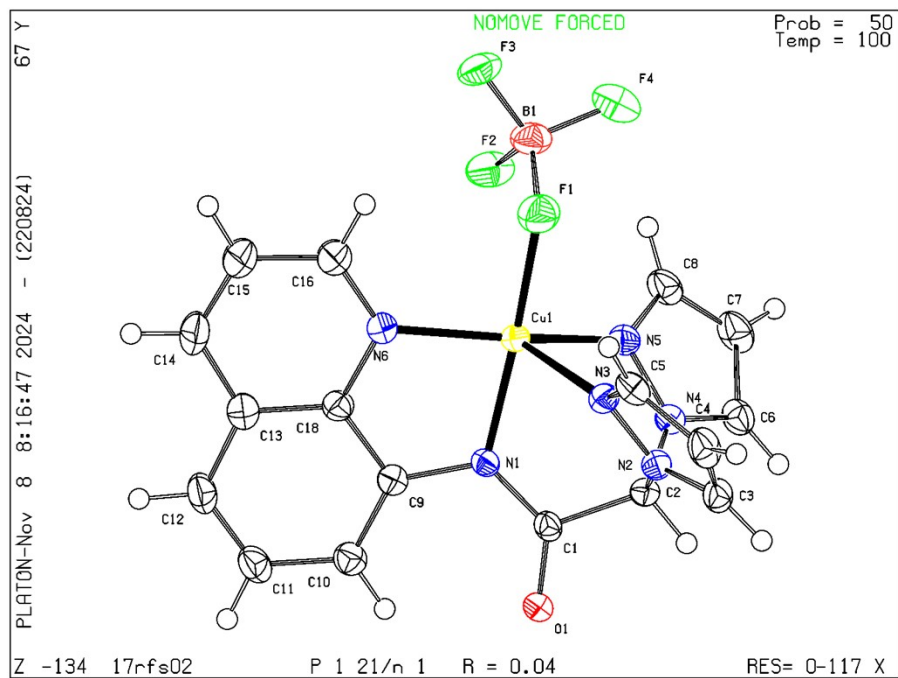

## ORTEP of $(L^2Pz)Cu(BF_4)$ .

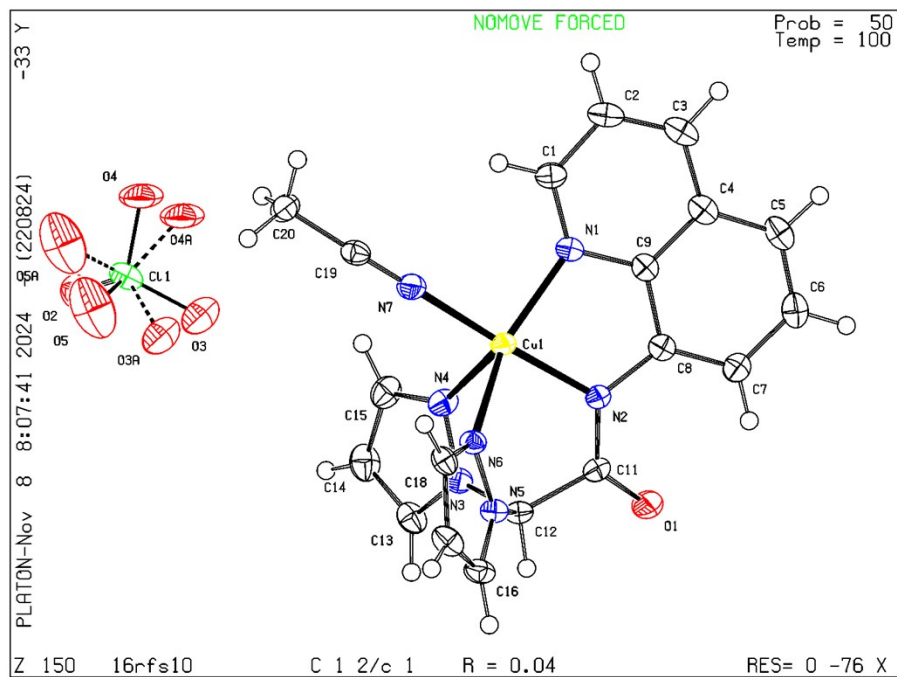

ORTEP of  $[(L^2Pz)Cu(NCMe)]ClO_4$ .

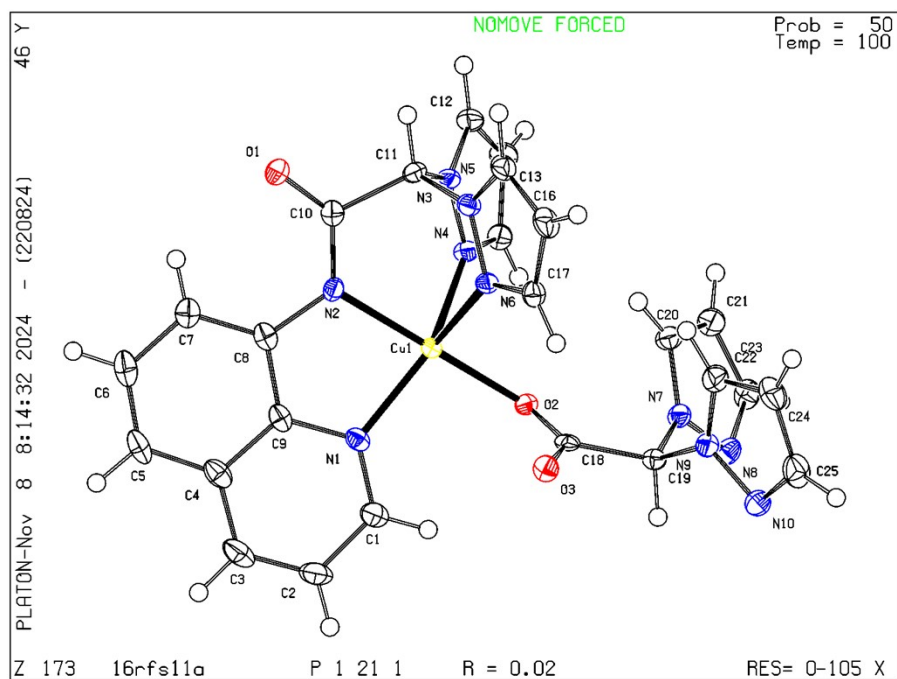

ORTEP of  $(L^2Pz)Cu[O_2CCH(pz)_2]$ .

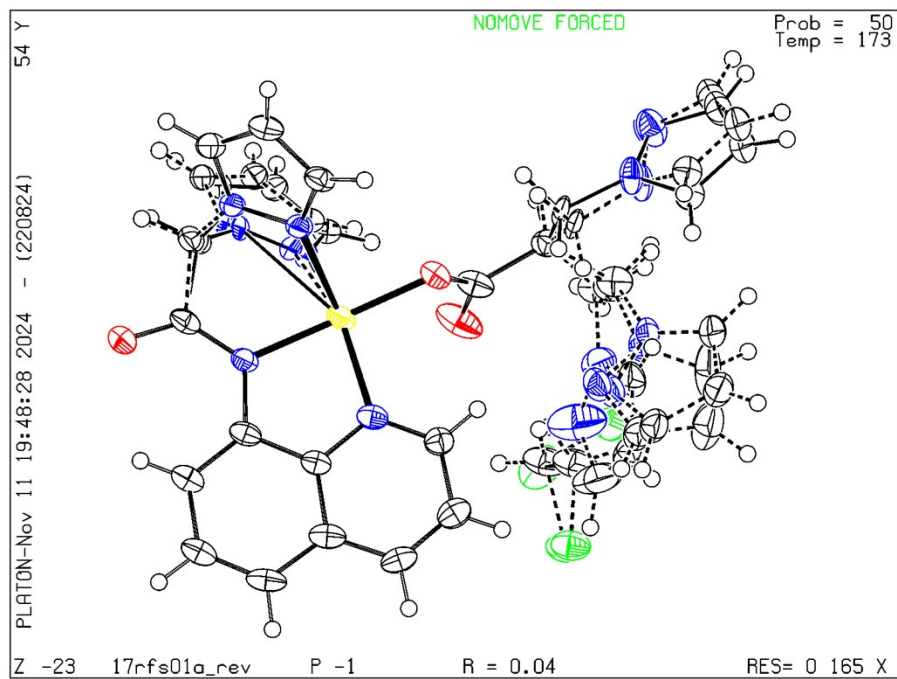

ORTEP of  $(L^{O_2Pz})Cu[O_2CCH(CH_2pz)_2]$ .

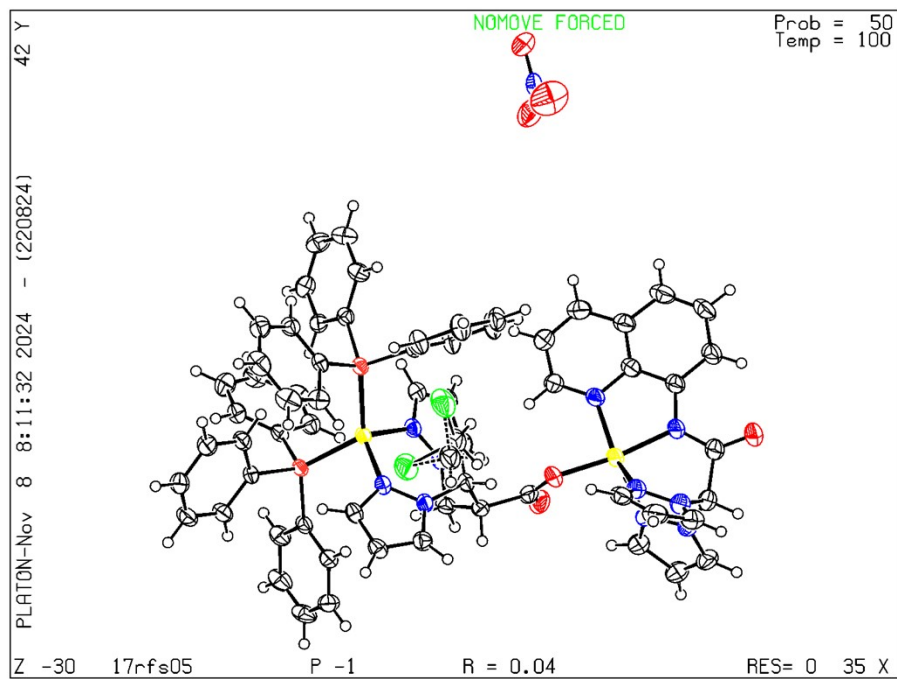

ORTEP of  $\{(L^{O_2Pz})Cu^{II}[O_2CCH(CH_2pz)_2]Cu^I(PPh_3)_2\}NO_3$ .

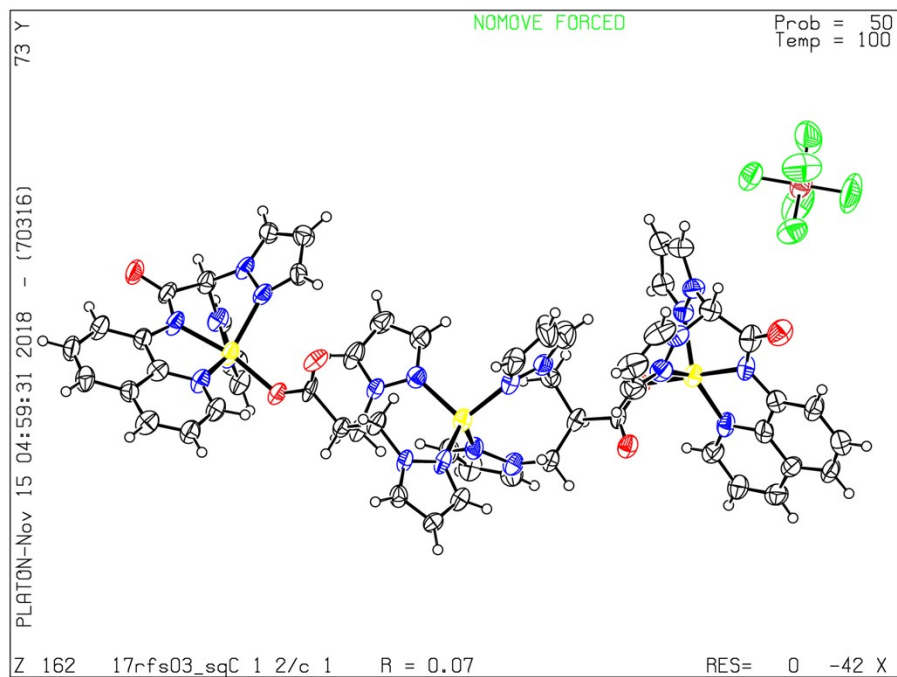

ORTEP of  $\{(L^{O2Pz})Cu^{II}[O_2CCH(CH_2pz)_2]\}_2Cu^I(PF_6)$ .

### PXRD Figures

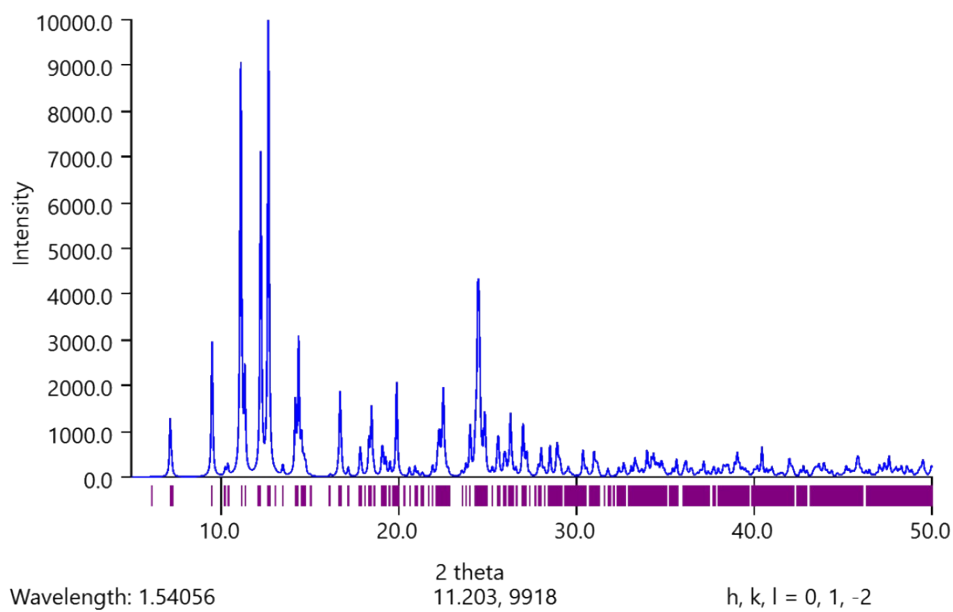

PXRD of  $(L^{O2Pz})Cu(OAc)$ .

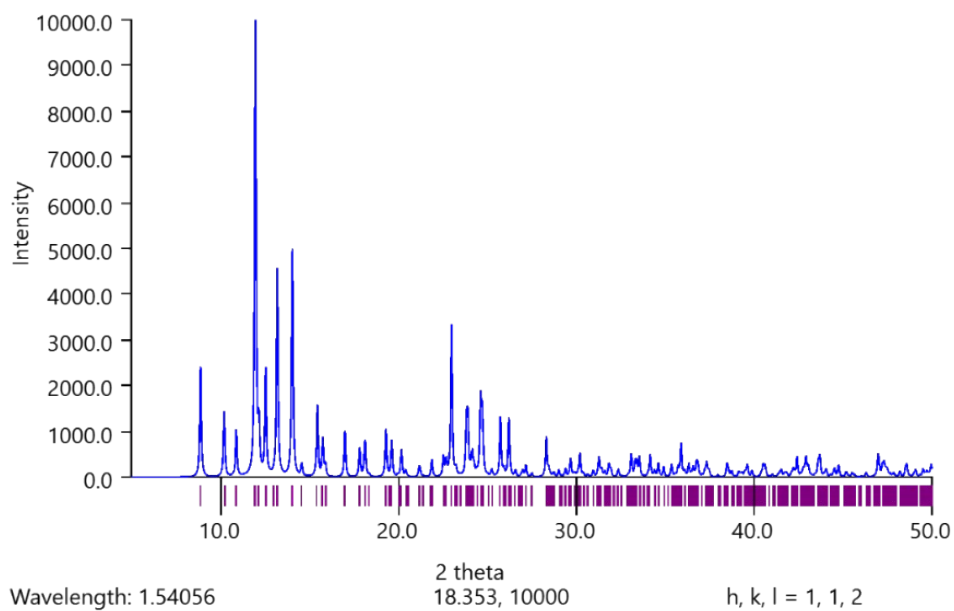

PXRD of  $(L^{Q2Pz})Cu(BF_4)$ .

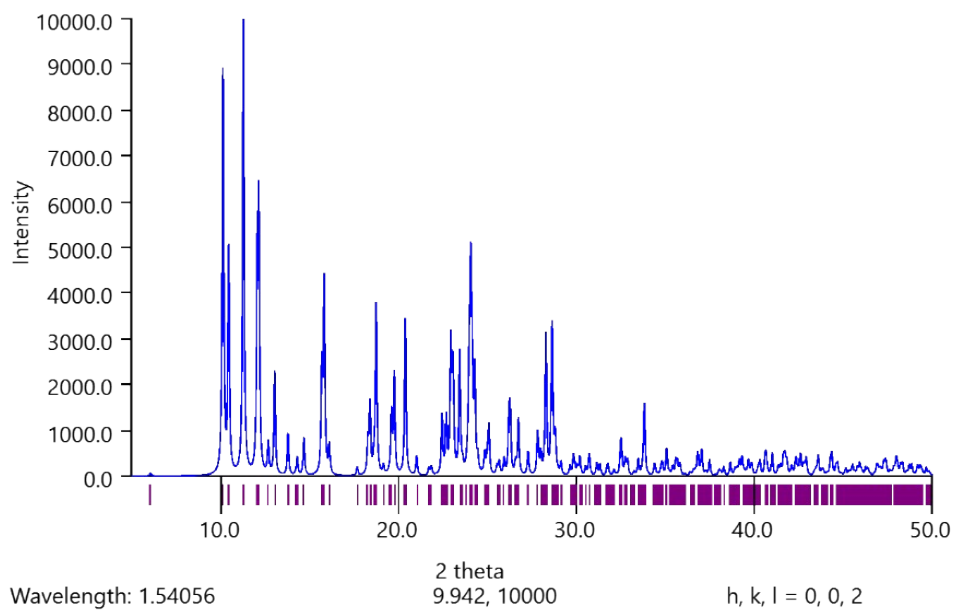

PXRD of  $[(L^{Q2Pz})Cu(NCMe)]ClO_4$ .

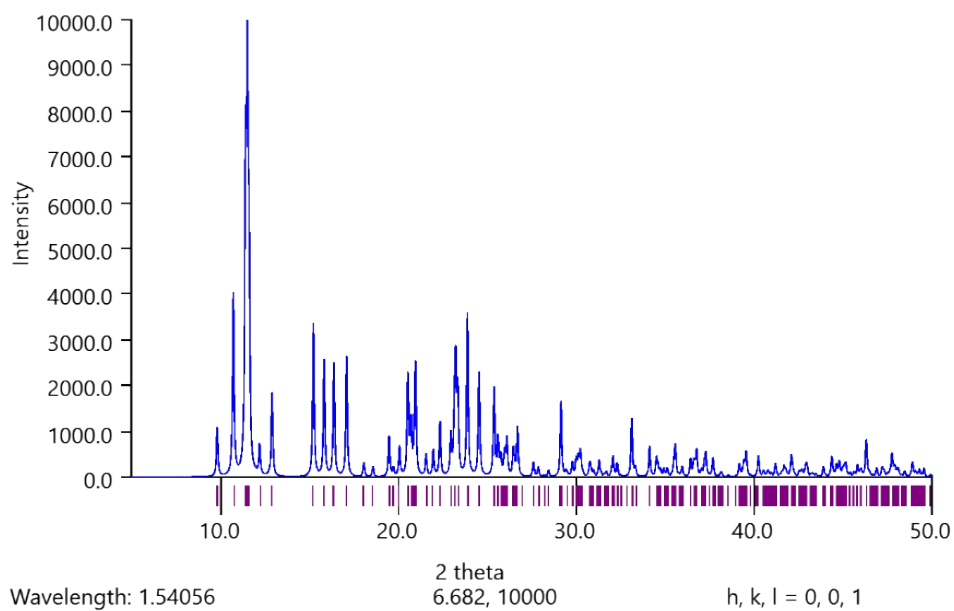

PXRD of  $(L^{Q2Pz})Cu[O_2CCH(pz)_2]$ .

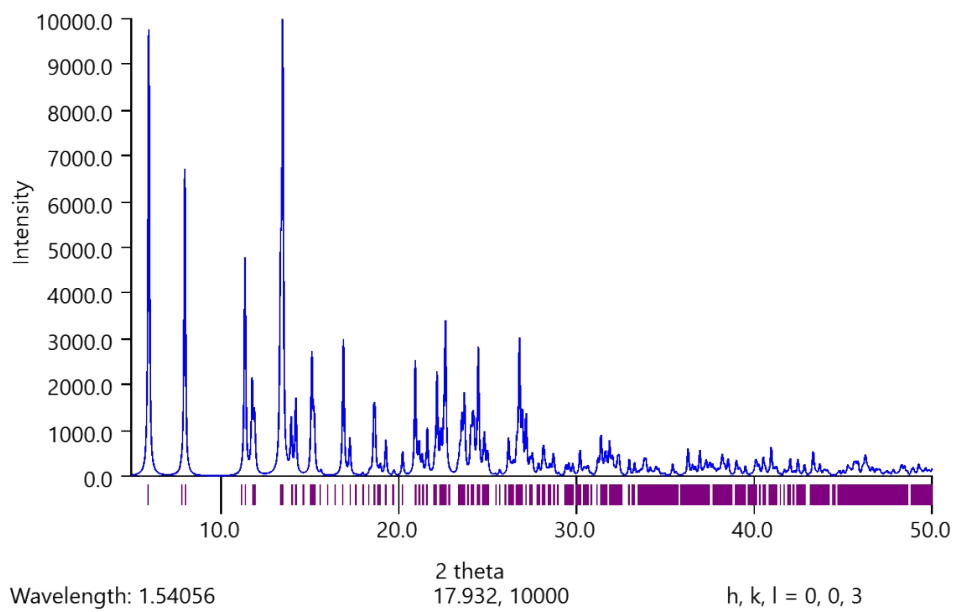

PXRD of  $(L^{Q2Pz})Cu[O_2CCH(CH_2pz)_2]$ .

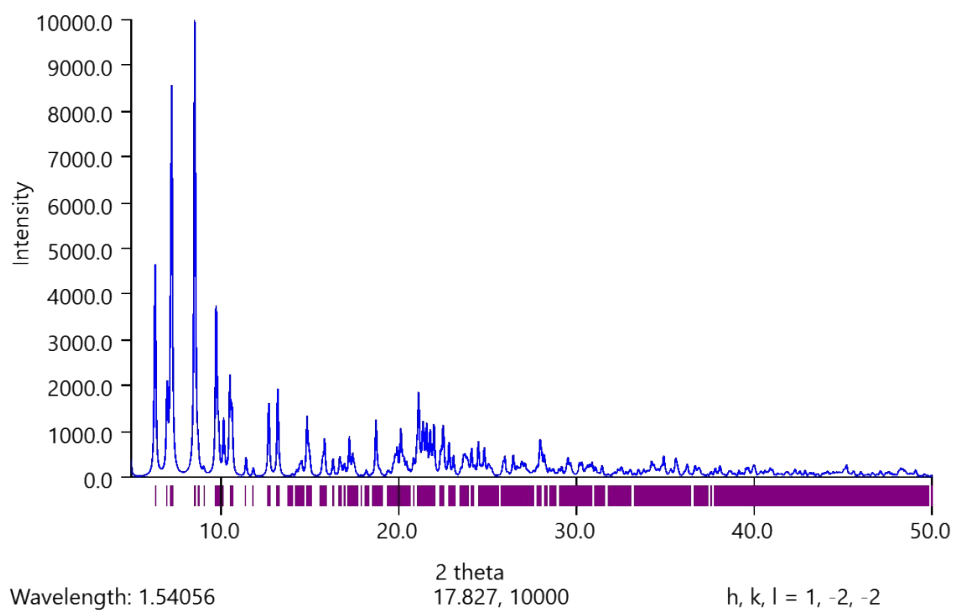

PXRD of  $\{(L^{O2Pz})Cu^{II}[O_2CCH(CH_2pz)_2Cu^I(PPh_3)_2]\}NO_3$ .

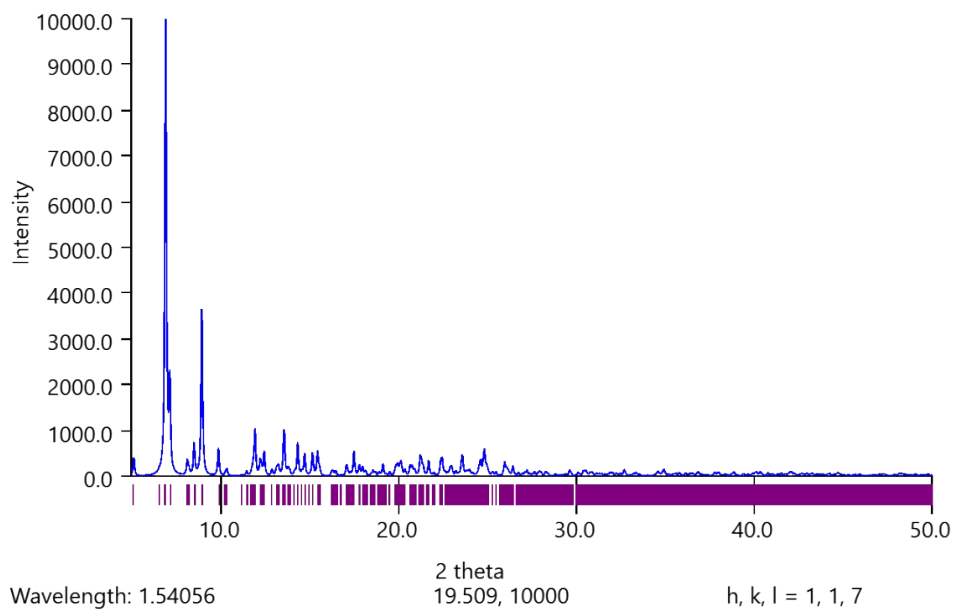

PXRD of  $\{(L^{O2Pz})Cu^{II}[O_2CCH(CH_2pz)_2]\}_2Cu^I(PF_6)$ .
